# Supplementary material for: Growth hormone reduces aneuploidy and improves oocytes quality by JAK2-MAPK3/1 pathway in aged mice
Source: Springer Nature journal article supplement (doi:10.1186/s12967-023-04296-z), 2023-06-29

## Normal

## Abnormal

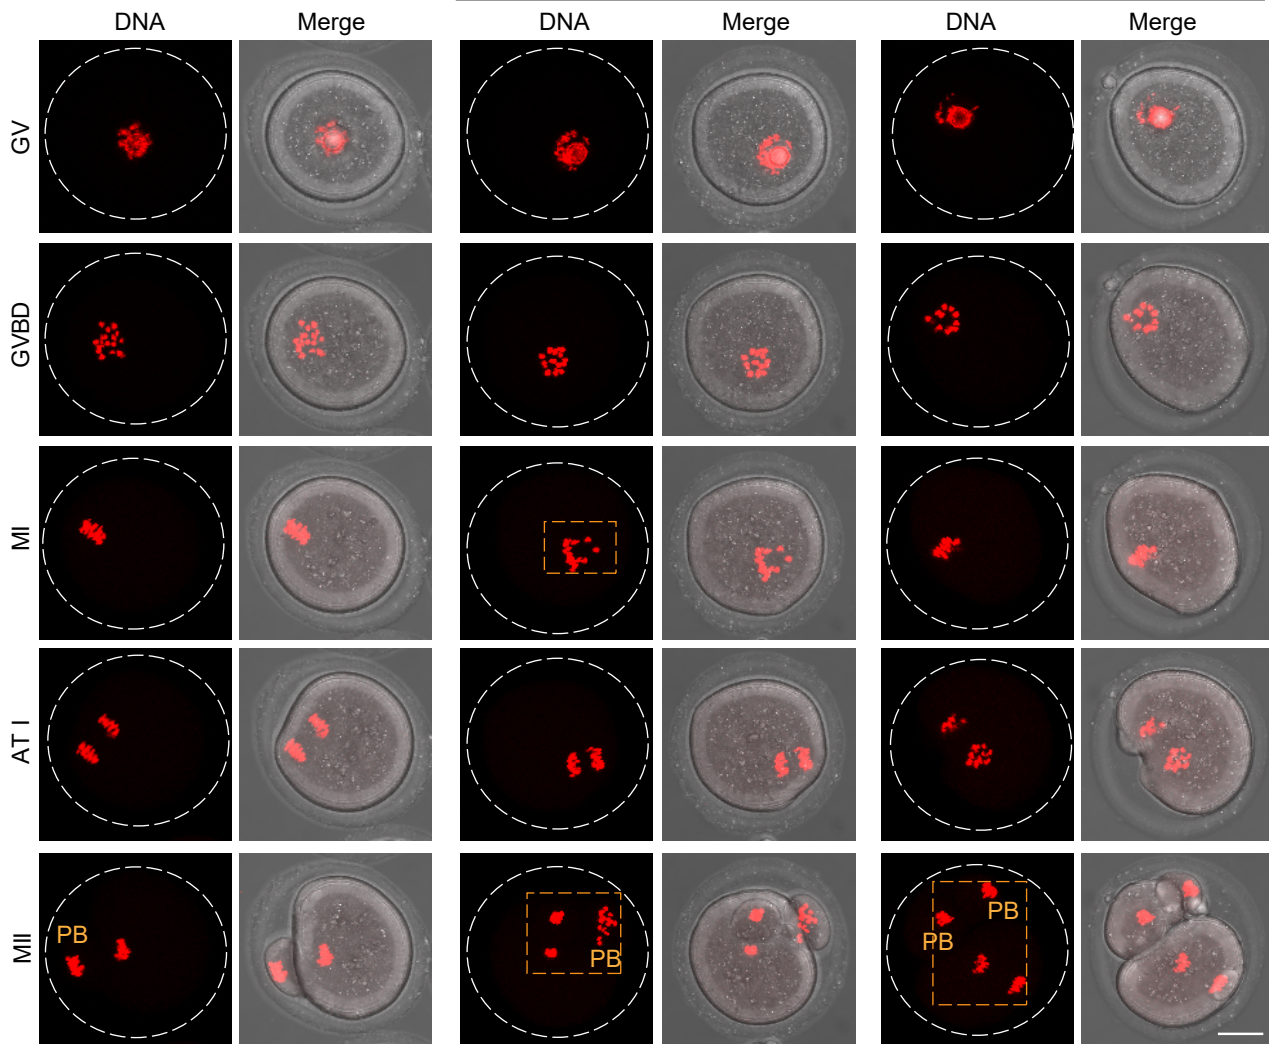

Supplement: MOESM4 [file 12967_2023_4296_MOESM4_ESM.pdf]
